# Supplementary material
Source: PubMed Central journal article supplement (PMC3583998)
Supplement: 5d05c8e84cbbb29d5afcf9f137c6139c_genetics.112.146522-6.pdf [file 5d05c8e84cbbb29d5afcf9f137c6139c_genetics.112.146522-6.pdf]

**A**

| Haploid strains | Copies of <i>SFA1-CUP1</i> |      |          |
|-----------------|----------------------------|------|----------|
|                 | Chr4                       | Chr5 | Total    |
| JAY357          | 0                          | 0    | <b>0</b> |
| JAY247          | 1                          | 0    | <b>1</b> |
| JAY372          | 0                          | 1    | <b>1</b> |
| JAY381          | 1                          | 1    | <b>2</b> |

**B**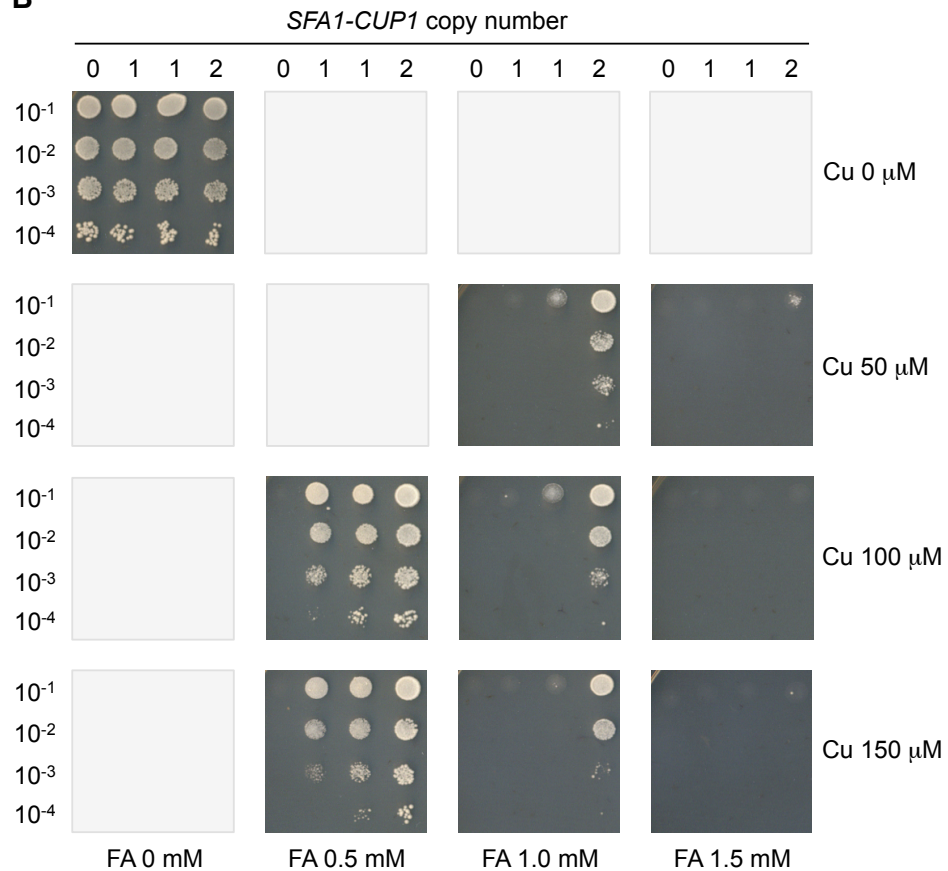

**Figure S2** FA and Cu concentration optimization trials: Haploids.

(A) Haploid strains used in the optimizations trials. The table shows the total copy number of the *SFA1-CUP1* reporter, and the site of reporter insertion in the genome. The Chr4 site is the *SFA1* locus and the Chr5 site is the *DDI1* locus.

(B) Representative reporter dosage-dependent resistance to different combinations of FA and Cu concentrations. Serial dilutions of strains JAY357, JAY247, JAY372, and JAY381 shown in (A) were spotted in this order, from left to right. Cells were grown for 3 days at 30°. Note that at equal dose, the Chr4 reporter insertion confers slightly lower resistance to FA/Cu than the Chr5 insertion, presumably due to a small difference in basal gene expression. The gray squares represent FA/Cu combinations not tested in this specific trail.
