# Supplementary material
Source: PubMed Central journal article supplement (PMC3583998)
Supplement: 461a28d80ef60a950c8803041c07e226_genetics.112.146522-2.pdf [file 461a28d80ef60a950c8803041c07e226_genetics.112.146522-2.pdf]

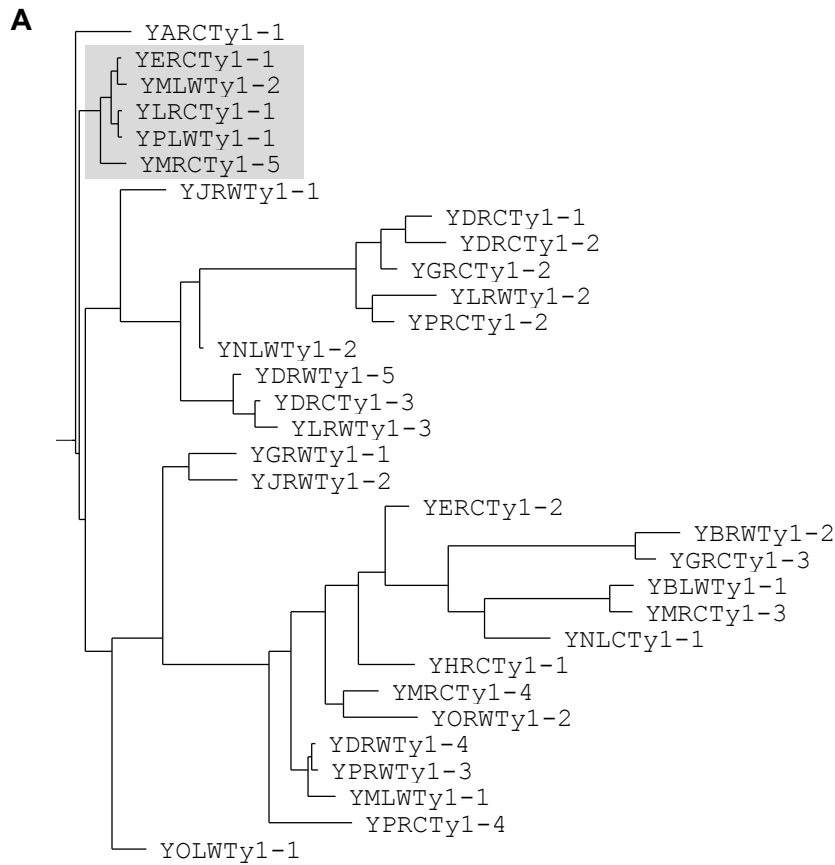

**B**

| Ty1 element      | Alignment size | Number of mismatches | Longest perfect match |
|------------------|----------------|----------------------|-----------------------|
| <i>YMLWTy1-2</i> | 5890           | 3                    | 3708                  |
| <i>YLRCTy1-1</i> | 5922           | 12                   | 2138                  |
| <i>YPLWTy1-1</i> | 5924           | 11                   | 2138                  |
| <i>YMRCTy1-5</i> | 5903           | 25                   | 2981                  |

**Figure S4** Nucleotide sequence similarity between Ty1 elements.

(A) Sequence similarity tree between all full length Ty1 retrotransposon elements annotated in the S288c genome, also including the un-annotated *YMRCTy1-5* element on the right arm of Chr13. The cluster of Ty1 elements most similar to *YERCTy1-1* is shaded in gray. (B) Sequence identity parameters between *YERCTy1-1* and the four other Ty1 elements most similar to it in the genome. Values are given in base pairs (bp).
