# Supplementary material
Source: PubMed Central journal article supplement (PMC3583998)
Supplement: 2155c4de42f794aa9f65b4944649e7b9_genetics.112.146522-3.pdf [file 2155c4de42f794aa9f65b4944649e7b9_genetics.112.146522-3.pdf]

**Table S2 Oligonucleotide primers used in this study**

| Primer | 5'-3' sequence and purpose                                                                                                                            |
|--------|-------------------------------------------------------------------------------------------------------------------------------------------------------|
| JAO99  | ACAGCATT <del>TTT</del> ACCTTTAAAGACGTTCTCATAATACATTTTAGGATTAATACATGAGCTCGTTTTCGACACTGG<br>For deletion of all <i>CUP1</i> repeats, Forward           |
| JAO100 | ATTTTTGAAAAAATGTATTACTCAAGACATTCGCTTCTAGGTCAGTCTTCATTCCTTACCATTAAGTTGATC<br>For deletion of all <i>CUP1</i> repeats, Reverse                          |
| JAO101 | ACAGCATT <del>TTT</del> ACCTTTAAAGACGTTCTCATAATACATTTTAGGATTAATACATATGTCGGTAATGGGATCGGC<br>For CORE removal and restoration of <i>RSC30</i> , Forward |
| JAO102 | AAATCACATTGATAAACCTGG<br>For CORE removal and restoration of <i>RSC30</i> , Reverse                                                                   |
| JAO326 | ATTCCGGAATTCTCAGTAGCGGTTATGAACACG<br>For producing distal <i>SFA1</i> homology, Forward, <i>EcoRI</i> site added to 5' end                            |
| JAO327 | ATTCGCGGATCCCAAGTTGCCATTCGACTGAGG<br>For producing distal <i>SFA1</i> homology, Reverse, <i>BamHI</i> site added to 5' end                            |
| JAO328 | ATTCGCGGATCCACGTCCTACATTCTATCAAAT<br>For producing proximal <i>SFA1</i> homology, Forward, <i>BamHI</i> site                                          |
| JAO329 | ATTCGCGTCTGACTTAGGAACAGGCGAGGTCAAT<br>For producing proximal <i>SFA1</i> homology, Reverse, <i>SalI</i> site added to 5' end                          |
| JAO291 | AGCTAAGGTACCTCAAGTGATGGGTACGTG<br>Proximal to <i>YMRCTy1-5</i> , Forward, <i>KpnI</i> site added to 5' end                                            |
| JAO294 | AGCTAAGAGCTCAAGAGCAAGAGTGCAGCC<br>Distal to <i>YMRCTy1-5</i> , Reverse, <i>SacI</i> site added to 5' end                                              |
| JAO510 | CTAATGTTTTATAAACGTTTTATGAATGACATATATGCGATAATTATATGCCTTACCATTAAGTTGATC<br>For producing <i>ymrcty1-5Δ::CORE</i> deletion product, Forward              |
| JAO511 | GTTCTTTTACACAACCATGATGGAAGTTGCATTGATTTTTGTTGGGAGCTCGTTTTCGACACTGG<br>For producing <i>ymrcty1-5Δ::CORE</i> deletion product, Reverse                  |

**Table S2 Oligonucleotide primers used in this study (continued)**

| Primer | 5'-3' sequence and purpose                                                                                                                               |
|--------|----------------------------------------------------------------------------------------------------------------------------------------------------------|
| JAO104 | ACTAGATCTCATATGGTGATACTTTATTTTC<br>For cloning <i>CUP1</i> fragment into pAG32, Forward, <i>Bgl</i> II added to 5' end                                   |
| JAO105 | ACTAGATCTCATATGTTTCATGTATGTATCT<br>For cloning <i>CUP1</i> fragment into pAG32, Reverse, <i>Bgl</i> II added to 5' end                                   |
| JAO113 | AATTAAGTAAGTAAAGCATGACTCAAATTTTCTGGAATACTTTGAAAATCAAATTAAGGCGCGCCAGATCT<br>For insertion of <i>CUP1-Hph</i> downstream of <i>SFA1</i> , Forward          |
| JAO114 | CAGGTCTAACTGATTGCTGAAGAACGTAATTGTGCGCATATATATGATATTGCATAGGCCACTAGTGGATC<br>For insertion of <i>CUP1-Hph</i> downstream of <i>SFA1</i> , Reverse          |
| JAO143 | CTGCATATTATATACTTAACAGAAGTACAATCATATACAATAACAAGCATAGGCCACTAGTGGATC<br>For insertion of <i>SFA1-CUP1-Hph</i> downstream of <i>DDI1</i> , Reverse          |
| JAO269 | TAAGTATAAGGATGTACATACTTTCATTGTTTCGTCAATTGTTGTGGTCCATTATTATCAACTGT<br>For insertion of <i>SFA1-CUP1-Hph</i> downstream of <i>DDI1</i> , Forward           |
| JAO457 | AGATCTGTTTAGCTTGCCTCG<br>To produce <i>Kan</i> fragment to replace <i>Hph</i> , Forward                                                                  |
| JAO458 | GCATAGGCCACTAGTGGATCT<br>To produce <i>Kan</i> fragment to replace <i>Hph</i> , Reverse                                                                  |
| JAO502 | TGTTAGTGATTGATATGTGTTTCTTTTTCACCTTAAAGGTGCTTAGCAAGGAGCCTTACCATTAAGTTGATC<br>To insert CORE and CORE2 downstream of <i>ADH6</i> , Forward                 |
| JAO503 | TTTTTATGATTATAAGGTAATTTAAATTTTACAACCTCGTACAGTTCTCGAGCTCGTTTTTCGACACTGG<br>To insert CORE and CORE2 downstream of <i>ADH6</i> , Reverse                   |
| JAO650 | ACGTGTACAGATCTTCAATTCATCTTTTTTTTTTTTGTCTTTTTTTTGATTCCGG<br><i>URA3</i> primer, used in the construction of pJA40, <i>Bgl</i> II site added to the 5' end |
| JAO336 | TGATGTTGTGAAGTCATTGAC<br><i>URA3</i> primer, used in the construction of pJA40                                                                           |

**Table S2 Oligonucleotide primers used in this study (continued)**

| Primer  | 5'-3' sequence and purpose                                                                                                                     |
|---------|------------------------------------------------------------------------------------------------------------------------------------------------|
| JAO487  | GTGGCTGTGGTTTCAGGGTCC<br>Upstream of <i>URA3</i> , Forward, used to amplify <i>URA3</i> and repair the <i>ura3-52</i> allele                   |
| JAO490  | GGCGAGGTATTGGATAGTTCC<br>Downstream of <i>URA3</i> , Reverse, used to amplify <i>URA3</i> and repair the <i>ura3-52</i> allele                 |
| JAO863  | GATGCTAAGAGATAGTGATG<br><i>URA3</i> primer, used to amplify the region upstream of <i>URA3</i>                                                 |
| JAO864  | <u>CGAGATTCCCGGTAATAACTGCCAATCTAAGTCTGTGCTCC</u><br><i>URA3</i> primer, used to amplify the region upstream of <i>URA3</i> , overlap to JAO865 |
| JAO865  | CAGTTATTACCCGGGAATCTCG<br><i>URA3</i> primer, used to amplify the region downstream of <i>URA3</i> , overlap to 5' end of JAO864               |
| JAO866  | ACAGTCCTGTCTTATTGTTTC<br><i>URA3</i> primer, used to amplify the region downstream of <i>URA3</i>                                              |
| JAO1029 | ACCTTAGAGTGCTCTAAGCC<br>Used with JAO1030 to amplify the region around the <i>EcoRI</i> SNP-RFLP on Chr13                                      |
| JAO1030 | GCTGGTGAAACTGTATTCATT<br>Used with JAO1029 to amplify the region around the <i>EcoRI</i> SNP-RFLP on Chr13                                     |
| JAO1031 | ACATTTGAGTTATTTGCTCAG<br>Used with JAO1032 to amplify the region around the <i>BglII</i> SNP-RFLP on Chr13                                     |
| JAO1032 | CGGAAACCGTTGCATCCAACC<br>Used with JAO1031 to amplify the region around the <i>BglII</i> SNP-RFLP on Chr13                                     |
