# Supplementary material
Source: PubMed Central journal article supplement (PMC3583998)
Supplement: 54570ce0d9d8d5fad2a10ee705602b71_genetics.112.146522-7.pdf [file 54570ce0d9d8d5fad2a10ee705602b71_genetics.112.146522-7.pdf]

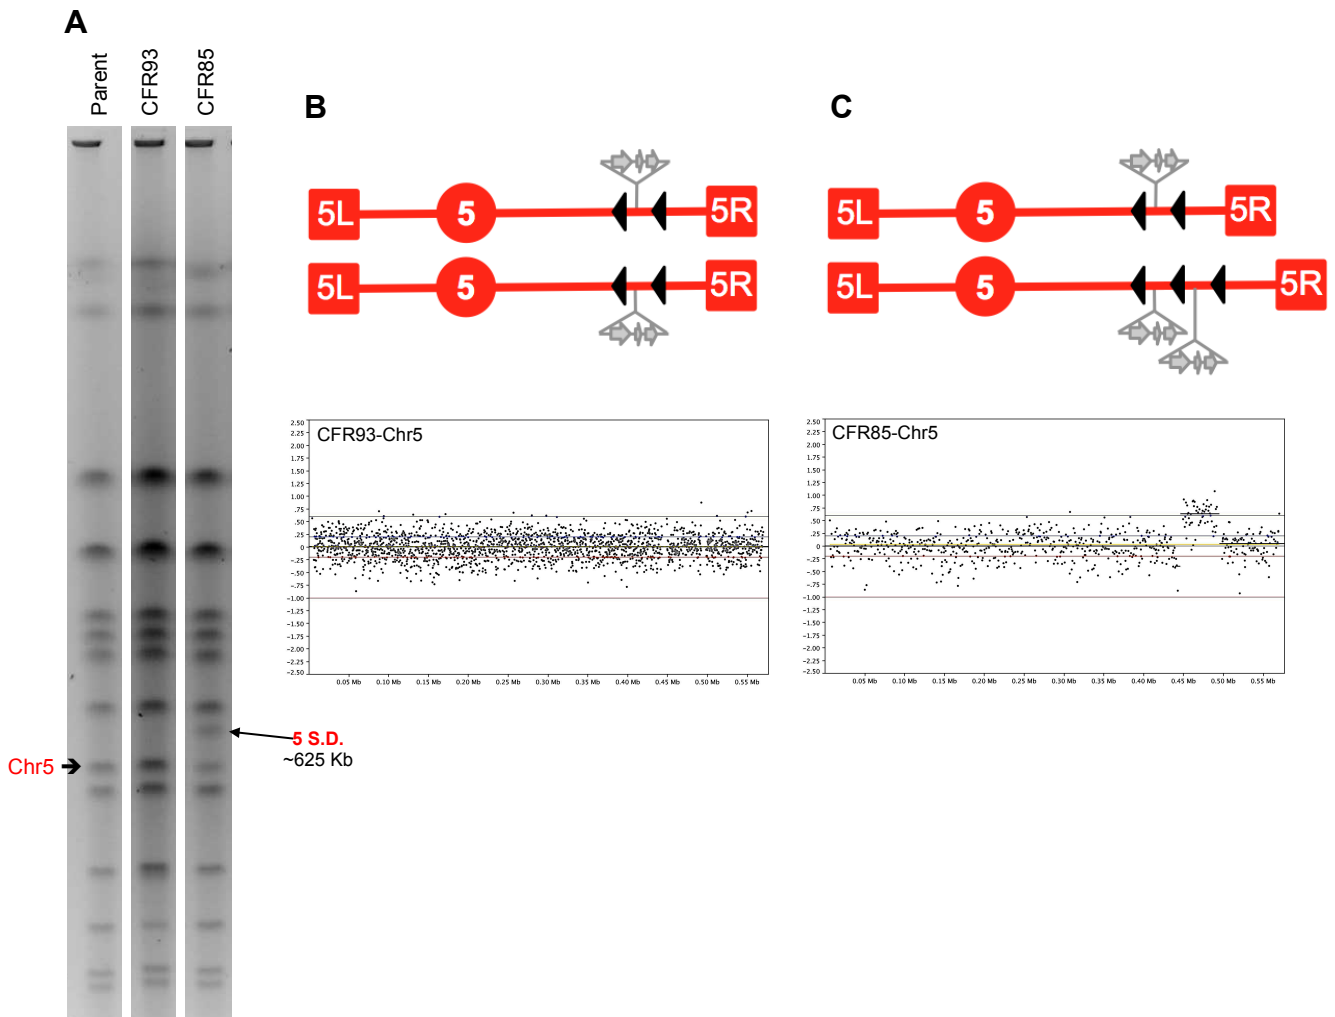

**Figure S6** CNV-less and segmental duplication CFR clones isolated from *msh2Δ/msh2Δ* diploids.

(A) PFGE showing the karyotypes of CFR93 (no visible karyotype changes) and CFR85, which shows a parental Chr5 band at approximately half the normal abundance (single copy), and a larger Chr5 band containing a segmental duplication.

(B) array-CGH and schematic representation of Chr5 CFR93. CFR93 does not show any gene dose changes in this chromosome or anywhere else in the genome. Instead, CFR93 was identified in the assay due to the presence of a dominant point mutation in the *SFA1* gene.

(C) array-CGH and schematic representation of Chr5 CFR85. CFR85 contains a parental copy of Chr5 and the second homolog contains a segmental duplication between *YERCTy1-1* and *YERCTy1-2*.
