# Supplementary material
Source: PubMed Central journal article supplement (PMC3583998)
Supplement: b88ab623e8c6c9f0cc3570c6040d85a7_genetics.112.146522-5.pdf [file b88ab623e8c6c9f0cc3570c6040d85a7_genetics.112.146522-5.pdf]

**A**

| Diploid strains | Copies of <i>SFA1-CUP1</i> |      |          |
|-----------------|----------------------------|------|----------|
|                 | Chr4                       | Chr5 | Total    |
| JAY275          | 0                          | 0    | <b>0</b> |
| JAY386          | 0                          | 1    | <b>1</b> |
| JAY350          | 0                          | 2    | <b>2</b> |
| JAY384          | 1                          | 2    | <b>3</b> |
| JAY385          | 2                          | 2    | <b>4</b> |

**B**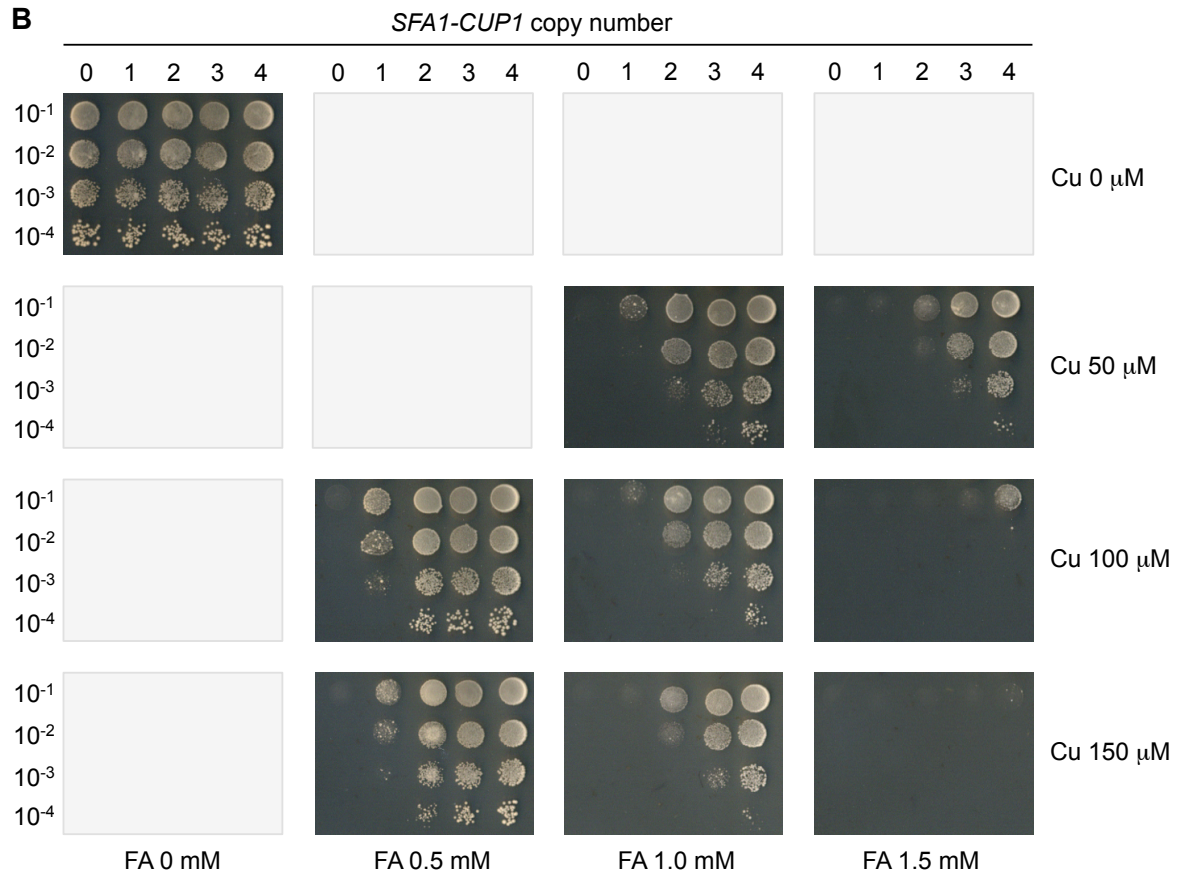

**Figure S3** FA and Cu concentration optimization trials: Diploids.

(A) Diploid strains used in the optimizations trials. The table shows the total copy number of the *SFA1-CUP1* reporter, and the site of reporter insertion in the genome. The Chr4 site is the *SFA1* locus and the Chr5 site is the *DDI1* locus.

(B) Representative reporter dosage-dependent resistance to different combinations of FA and Cu concentrations. Serial dilutions of strains JAY275, JAY386, JAY350, JAY384, and JAY385 shown in (A) were spotted in this order, from left to right. Cells were grown for 3 days at 30°. The gray squares represent FA/Cu combinations not tested in this specific trial.
