# Supplementary material
Source: PubMed Central journal article supplement (PMC3583998)
Supplement: c9324165130a6740b4f5e9b673fbcac6_genetics.112.146522-8.pdf [file c9324165130a6740b4f5e9b673fbcac6_genetics.112.146522-8.pdf]

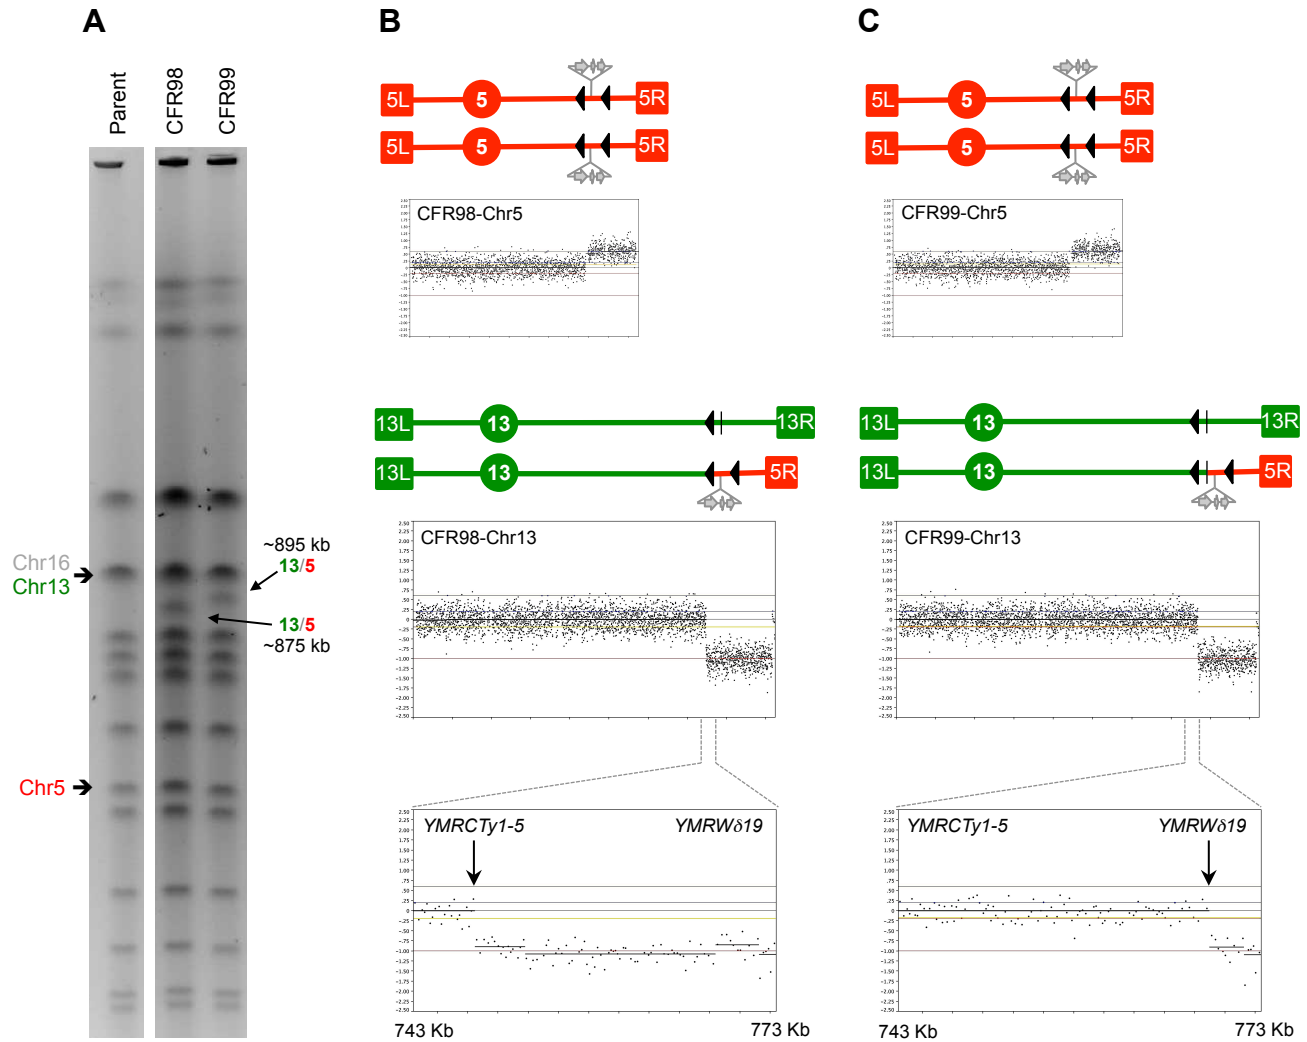

**Figure S5** Chr13/Chr5 translocations in two CFR clones isolated from *msh2Δ/msh2Δ* diploids.

(A) PFGE showing the karyotypes of CFR98 and CFR99, with their respective Chr13/Chr5 translocations indicated.

(B) and (C) array-CGH and schematic representation of the Chr13/Chr5 translocations in CFR98 and CFR99, respectively. The black arrowheads represent full length Ty1 elements, the vertical thin black line represents the *YMRWδ19* LTR on Chr13. The Chr5 breakpoints are near the *YERCTy1-1* / *YERWδ20B* region in both clones. The array-CGH plots at the bottom of the panels show the expanded view of the 40 kb Chr13 region where deletion breakpoints (black arrows) were detected in each clone. The deletion in CFR98 starts at *YMRCTy1-5*, whereas the deletion in CFR99 starts ~20 kb to the right at *YMRWδ19*.
